# Supplementary material for: Incidence of Recurrence and Time to Recurrence in Stage I to III Colorectal Cancer: A Nationwide Danish Cohort Study
Source: PubMed Central journal article supplement (PMC10654928; doi:10.1001/jamaoncol.2023.5098), 2023-11-16
Supplement: jamaoncol-e235098-s001.pdf [file jamaoncol-e235098-s001.pdf]

## Supplemental Online Content

Nors J, Iversen LH, Erichsen R, Gotschalck KA, Andersen CL. Incidence of recurrence and time to recurrence in stage I to III colorectal cancer, 2004 to 2019: a nationwide Danish cohort study. *JAMA Oncol*. Published online November 30, 2023. doi:10.1001/jamaoncol.2023.5098

**eFigure 1.** Timeline of the Management of CRC in Denmark, 2004 to 2019

**eMethods.** Management of Nonmetastatic CRC in Denmark, 2004 to 2019

**eTable 1.** Dates for Last Update of the Included Registries and Their Tables

**eFigure 2.** Algorithm Used to Identify CRC Recurrence from Danish Health Care Registries

**eTable 2.** Classification Codes Used to Identify Oncological Departments From 2004 to 2022

**eFigure 3.** Flowchart of Cohort Selection

**eResults.** Study Population

**eFigure 4.** Distribution of UICC Stage I to III CRC From 2004 to 2019 by Tumor Site

**eTable 3.** Multivariable Analysis Model of the Association Between Calendar Period of Primary Surgery and the Risk of Recurrence Within 5 Years After Primary Surgery in Stage I to III CRC

**eFigure 5.** Cumulative Incidence Curves for CRC Recurrence by Calendar Period of Primary Surgery and Stratified by Tumor Site and UICC Stage

**eFigure 6.** CRC Recurrences by Postoperative Year Stratified by Calendar Period of Primary Surgery

**eFigure 7.** Density Plot of Time From Surgery to Recurrence in Patients with CRC Recurrence by Calendar Period

**eFigure 8.** Time From Surgery to Recurrence (Among Patients With Recurrence Within 5 Years After Primary Surgery) by UICC TNM Stage in Patients with UICC Stage I to III CRC Treated in 2004-2008, 2009-2013, and 2014-2019

**eTable 4.** Patient Demographics and Treatment Characteristics of the 2014-2019 Study Population by Screening Status

**eFigure 9.** Association Between TN Category and Screening Status in Patients with UICC Stage I to III CRC

**eTable 5.** Rates and Hazards of Recurrence in Screening- vs. Nonscreening-Detected UICC Stage I to III CRC, 2014 to 2019

**eTable 6.** Decrease in Risk of Recurrence by Screening Status and Improved Treatment from 2009-2013 and 2014-2019 in UICC Stage I to III CRC

This supplemental material has been provided by the authors to give readers additional information about their work.

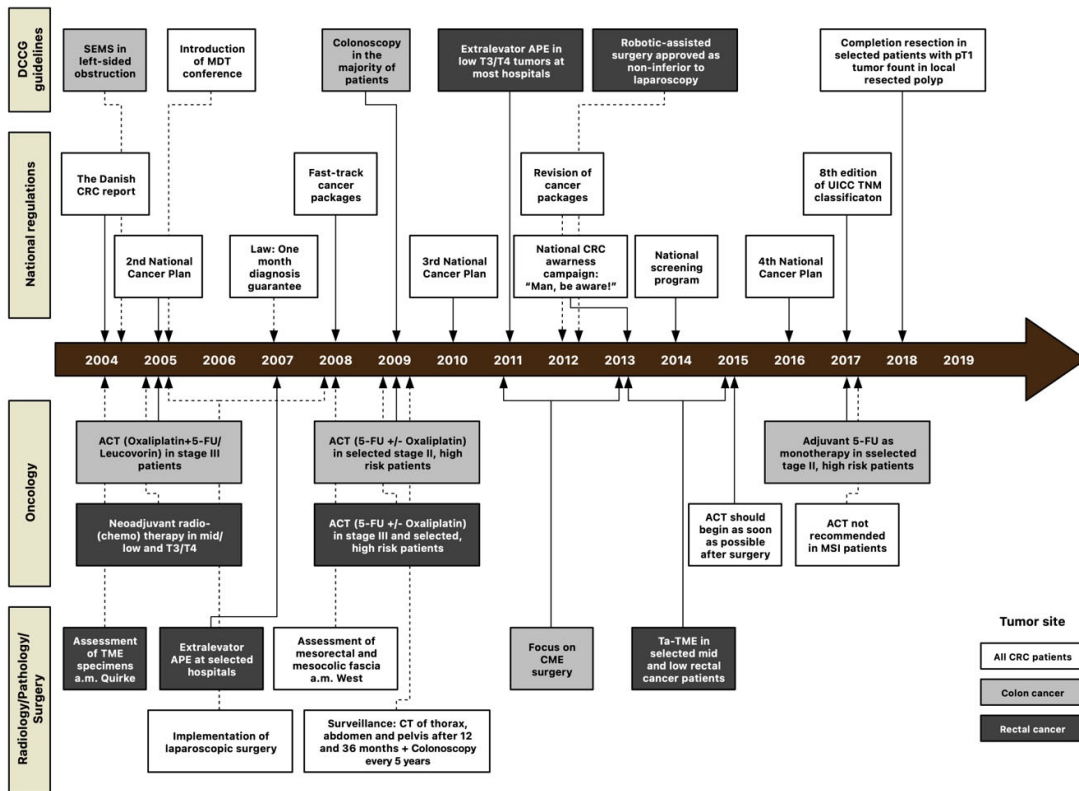

**eFigure 1.** Timeline of the Management of CRC in Denmark, 2004 to 2019

Timepoints are approximations.

Adopted from Iversen LH, Green A, Ingeholm P, Østerlind K, Gögenur I. Improved survival of colorectal cancer in Denmark during 2001-2012—the efforts of several national initiatives.

*Acta Oncol.* 2016;55(suppl 2):10-23.).

**eMethods: *Management of Nonmetastatic CRC in Denmark, 2004 to 2019***

The diagnosis is based on histological verification. As per recommendations, patients receive a preoperative clinical TNM stage (cTNM) according to UICC classification of malignant tumors based on radiological imaging; CT of thorax, abdomen and pelvis and supplemented with MRI of the pelvis in rectal cancer patients. The treatment of all patients should be evaluated at a multidisciplinary team conference (MDT). Neoadjuvant treatment is guided by cTNM.

Following surgery with curative intent, the pathological TNM stage (pTNM) informs the use of adjuvant chemotherapy (ACT) for all stage III patients and stage II patients with clinical and histopathological risk factors. A complete colonoscopy to identify synchronous colorectal lesions is recommended postoperatively if not performed preoperatively.

All patients are offered postoperative surveillance that since 2009 includes CT scan of thorax, abdomen, and pelvis at 12 and 36 months, as a minimum, and colonoscopy every five years after surgery until age of 75 years.

The Danish CRC screening program was introduced in March 2014 and includes all individuals aged 50–74 years and is free of charge. Individuals are offered biennial screening using a fecal immunochemical test (FIT), and in case of a positive result (100 ng hemoglobin/ml), the individual is offered a colonoscopy.

| Registry    | Table(s)                  | Last update before data retrieval                    | Data retrieved |
|-------------|---------------------------|------------------------------------------------------|----------------|
| CRS         | T_CIVIL                   | 2022-12-21                                           | 2023-01-01     |
|             | T_CIVIL_HIST              |                                                      |                |
|             | T_PERSON                  |                                                      |                |
|             | DANSK_OPHOLD_PERIODE_UNIK |                                                      |                |
| DCR         | T_TUMOR                   | 2022-03-25                                           | 2023-01-01     |
| DPR         | T_REKV_NY                 | 2022-12-03                                           | 2023-01-01     |
|             | T_DIAGN_NY                | 2022-12-10                                           |                |
| DNPR        | T_ADM                     | Not updated after the implementation of LPR3 in 2019 | 2023-01-01     |
|             | T_DIAG                    |                                                      |                |
|             | T_SKSOPR                  |                                                      |                |
|             | T_SKSUBE                  |                                                      |                |
| DNPR (LPR3) | DIAGNOSE                  | 2022-12-31                                           | 2023-01-01     |
|             | KONTAKT                   |                                                      |                |
|             | LOKALRECIDIVER            |                                                      |                |
|             | METASTASER                |                                                      |                |
| DCCG        | NA                        | 2021-03-05                                           | 2021-03-05     |

**eTable 1.** Dates for Last Update of the Included Registries and Their Tables

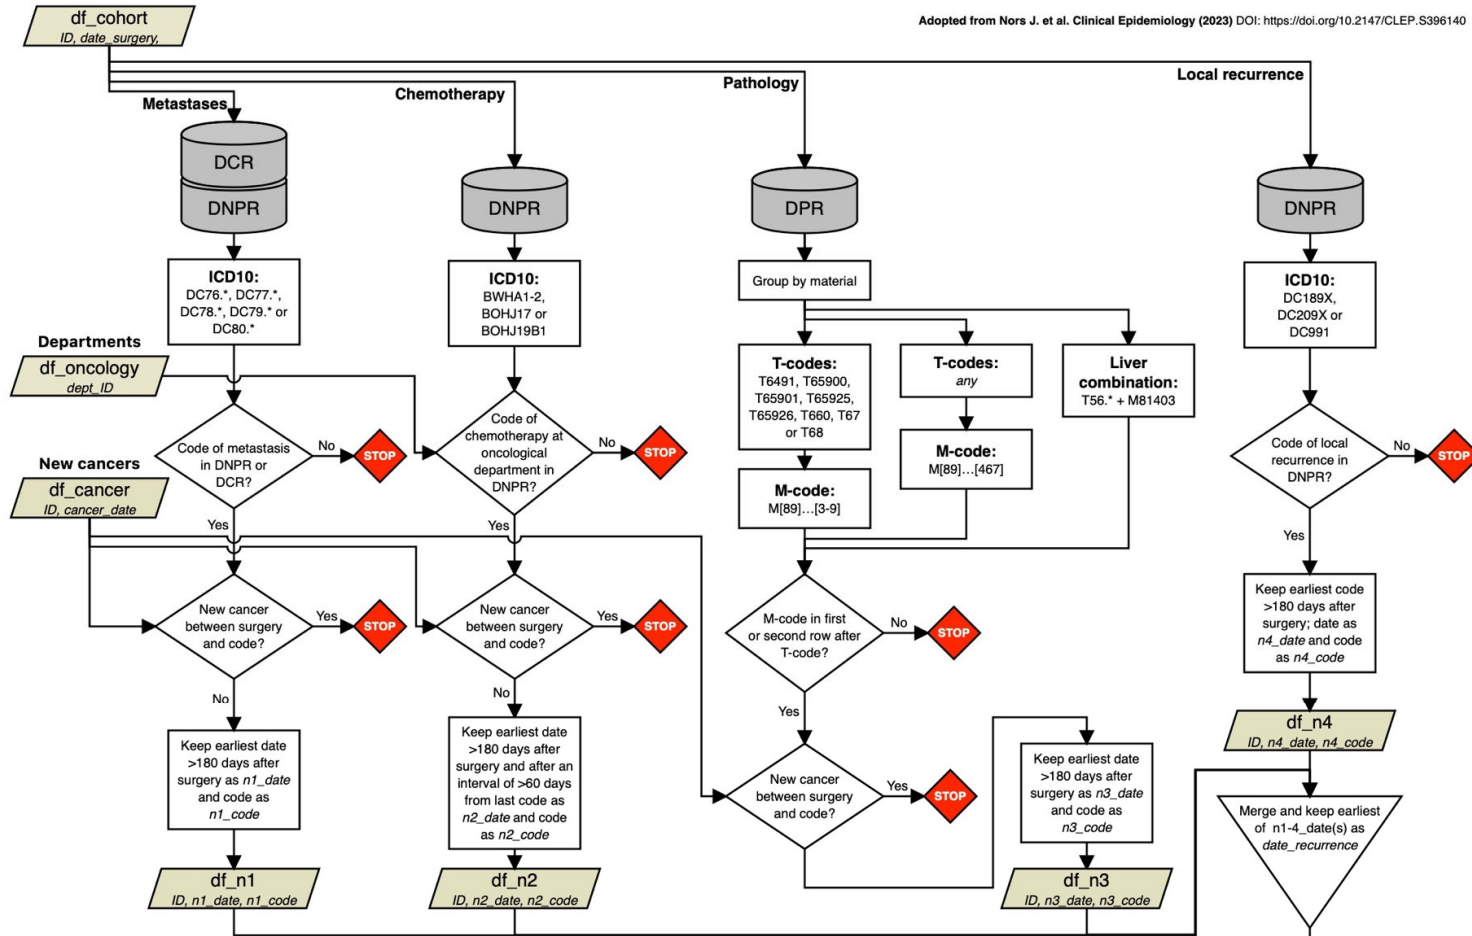

**Abbreviations:** DCR: Danish Cancer Registry, DNPR: Danish National Patient Registry, DPR: Danish Pathology Registry.  
**df\_cohort:** UICC TNM stage I-III CRC patients from the Danish Colorectal Cancer Group database with no previous cancers and alive and at risk of recurrence 180 days after surgery.  
**df\_oncology:** Vector of identification codes for oncological departments at Danish hospitals from 2004 to 2023.  
**df\_cancer:** New cancers other than CRC and non-melanoma skin cancer after primary CRC identified in the Danish Cancer Registry.  
**df\_n1-4:** Date and triggering code identified by the four indicators of recurrence in individual data frames.  
**df\_recurrence:** Data frame with patient identifier, date of surgery, date of recurrence and triggering indicator with code(s).

**eFigure 2.** Algorithm Used to Identify CRC Recurrence from Danish Health Care Registries

Modified from Nors J, Mattesen TB, Cronin-Fenton D, et al. Identifying recurrences among non-metastatic colorectal cancer patients using national health data registries: validation and optimization of a registry-based algorithm in a modern Danish cohort. *Clin Epidemiol.* 2023;15:241-250. Originally published by and used with permission from Dove Medical Press Ltd.

| Registry                                | Hospital, City                             | Time Period | Classification Code |
|-----------------------------------------|--------------------------------------------|-------------|---------------------|
| DNPR V2                                 | Rigshospitalet, Copenhagen                 | 2004-2019   | 130172.*            |
|                                         | Herlev Hospital, Herlev                    | 2004-2019   | 151613.*            |
|                                         | Sjællands Universitetshospital, Roskilde   | 2007-2019   | 3800A9.*            |
|                                         |                                            | 2004-2007   | 250119.*            |
|                                         | Næstved Sygehus, Næstved                   | 2007-2019   | 3800N8.*            |
|                                         |                                            | 2004-2007   | 350045.* 350120.*   |
|                                         | Bornholms Hospital, Rønne                  | 2004-2019   | 400109.*            |
|                                         | Odense University Hospital, Odense         | 2004-2019   | 420226.*            |
|                                         | Sygehus Sønderjylland, Sønderborg/Aabenraa | 2004-2019   | 5001057 500061.*    |
|                                         | Sydvestjysk Sygehus, Esbjerg               | 2005-2019   | 550105C 5501050     |
|                                         |                                            | 2004        | 550105C 5501269     |
|                                         | Vejle Sygehus, Vejle                       | 2004-2019   | 600818.*            |
|                                         | Hospitalsenheden Vest, Herning             | 2010-2019   | 665036.*            |
|                                         |                                            | 2004-2012   | 650216.*            |
|                                         | Aarhus University Hospital, Aarhus         | 2004-2019   | 700325.*            |
|                                         |                                            | 2011-2019   | 662025.*            |
| Aalborg University Hospital, Aalborg    | 2004-2019                                  | 800126.*    |                     |
| Regionshospitalet Nordjylland, Hjørring | 2006-2010                                  | 800326.*    |                     |
| DNPR V3                                 | SPECIALE == "ONKOLOGI" (2019-2022)         |             |                     |

**eTable 2.** Classification Codes Used to Identify Oncological Departments From 2004 to 2022

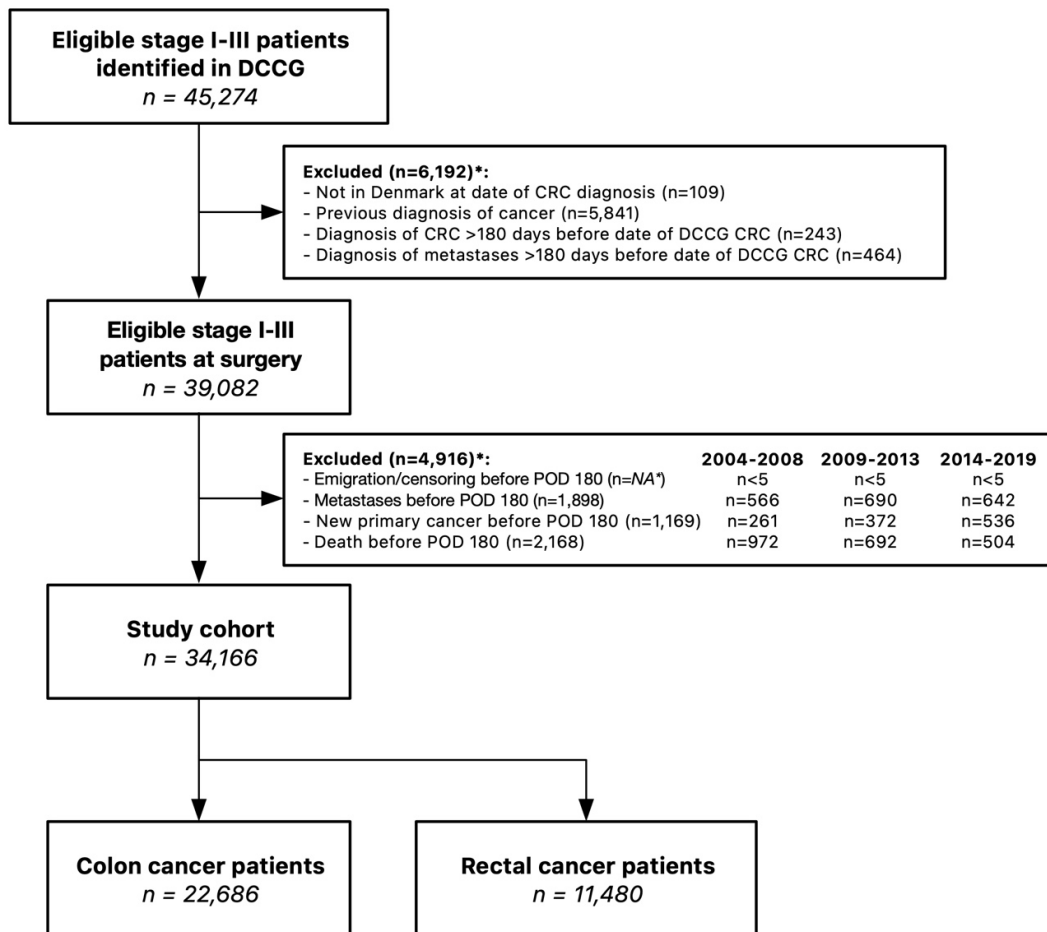

**eFigure 3.** Flowchart of Cohort Selection

All patients undergoing intended curative surgery for UICC TNM stage I-III CRC in Denmark from 1st January 2004, through 31st December 2019 were eligible for inclusion. Patients were excluded if they did not fulfill the requirements of the recurrence calling algorithm.

\*Some patients were excluded due to more than one criterion, and cell-sizes <5 are reported in aggregate to reduce identification of individuals in the data.

Abbreviations: DCCG = Danish Colorectal Cancer Group. CRC = Colorectal cancer. POD = Postoperative day.



### **eResults: Study Population**

We identified 45,274 patients undergoing curative intent surgery for incident UICC TNM stage I-III CRC between January 1, 2004, and December 31, 2019 in the DCCG database. Initial exclusion involved 109 patient who were not in Denmark on date of CRC diagnosis according to the Danish Civil Registration System Registry (Danish: CPR-registret) and 5,841 with a history of a previous cancer other than CRC (ICD-10 DC18-20) or non-melanoma skin cancer (DC44). Furthermore, 243 were excluded due to diagnosis of CRC more than 180 days before CRC diagnosis in DCCG, and 464 patients were excluded due to diagnosis of metastases more than 180 days before CRC diagnosis in DCCG. Patients may be excluded due to more than one criterion.

This resulted in a cohort of 39,082 stage I-III patients, who were eligible at time of surgery. However, as the algorithm is not validated to identify recurrence within the first 180 postoperative days, as some patients receive 6 months of ACT and the M-category in DCR is updated retrospectively after 4 months (early metastases are interpreted as synchronous lesions and the patient is upstaged to UICC stage IV), we excluded 4,916 patients that either emigrated, were diagnosed with a second primary cancer, were diagnosed with metastases or died within the first 180 postoperative days. The proportion of patients excluded within 180 days from surgery decreased through the study period (2004-2008: 15.6%, 2009-2013: 14.5% and 2014-2019: 9.4%). This was primarily due to improved 180-day overall survival (2004-2008: 91.1% [95% CI: 90.5%-91.6%], 2009-2013: 94.0% [93.6%-94.5%] and 2014-2019: 97.0% [96.8%-97.3%]). The final cohort consisted of 34,166 patients, who all were at risk of recurrence 180 days after surgery.

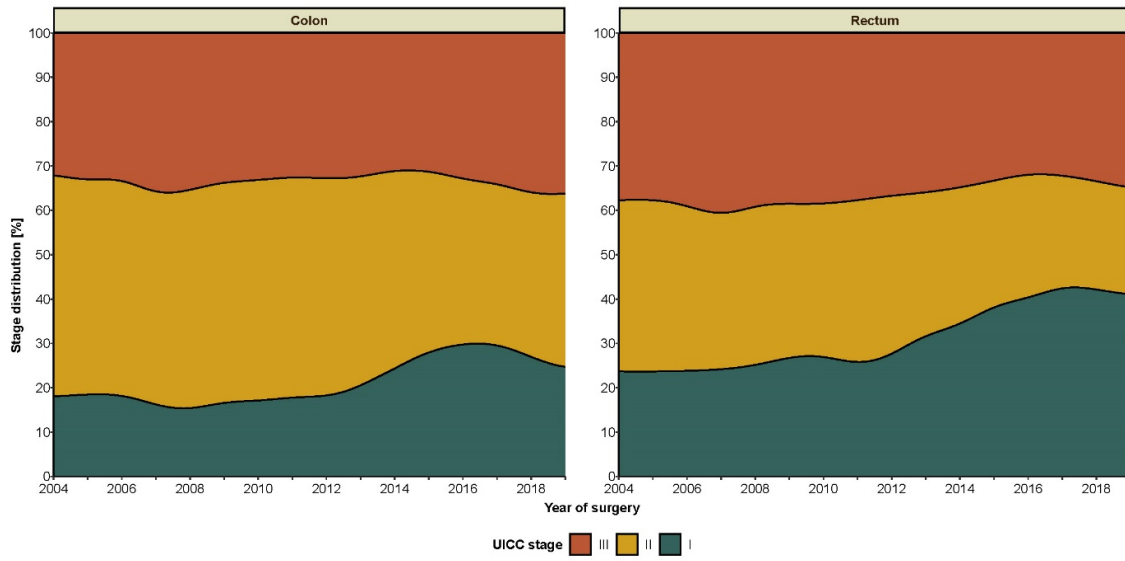

**eFigure 4.** Distribution of UICC Stage I to III CRC From 2004 to 2019 by Tumor Site

**eTable 3.** Multivariable Analysis Model of the Association Between Calendar Period of Primary Surgery and the Risk of Recurrence Within 5 Years After Primary Surgery in Stage I to III CRC

| Characteristic                    | Cumulative incidence function | Univariate regression |                 | Multivariable regression |                 |
|-----------------------------------|-------------------------------|-----------------------|-----------------|--------------------------|-----------------|
|                                   | 5-year CIF                    | sHR <sup>†</sup>      | CI <sup>†</sup> | sHR <sup>†</sup>         | CI <sup>†</sup> |
| <b>Exposure variable</b>          |                               |                       |                 |                          |                 |
| <b>Calendar period</b>            |                               |                       |                 |                          |                 |
| 2004-2008                         | 27% (26%, 28%)                | 1.00                  | Reference       | 1.00                     | Reference       |
| 2009-2013                         | 22% (22%, 23%)                | 0.80                  | 0.76, 0.85      | 0.82                     | 0.78, 0.87      |
| 2014-2019                         | 16% (15%, 16%)                | 0.55                  | 0.52, 0.58      | 0.59                     | 0.56, 0.62      |
| <b>Confounder variables</b>       |                               |                       |                 |                          |                 |
| <b>Tumor site</b>                 |                               |                       |                 |                          |                 |
| Colon                             | 19% (19%, 20%)                | 1.00                  | Reference       | 1.00                     | Reference       |
| Rectum                            | 24% (23%, 25%)                | 1.25                  | 1.20, 1.32      | 1.26                     | 1.20, 1.33      |
| <b>UICC stage</b>                 |                               |                       |                 |                          |                 |
| I                                 | 12% (11%, 13%)                | 1.00                  | Reference       | 1.00                     | Reference       |
| II                                | 18% (17%, 19%)                | 1.60                  | 1.49, 1.73      | 1.52                     | 1.41, 1.64      |
| III                               | 31% (30%, 32%)                | 3.01                  | 2.80, 3.22      | 2.80                     | 2.61, 3.01      |
| <b>Sex</b>                        |                               |                       |                 |                          |                 |
| Female                            | 20% (19%, 20%)                | 1.00                  | Reference       | 1.00                     | Reference       |
| Male                              | 22% (21%, 23%)                | 1.14                  | 1.09, 1.19      | 1.12                     | 1.07, 1.18      |
| <b>Age group at surgery</b>       |                               |                       |                 |                          |                 |
| <55                               | 25% (24%, 27%)                | 1.29                  | 1.20, 1.39      | 1.18                     | 1.10, 1.28      |
| 55-64                             | 22% (21%, 23%)                | 1.09                  | 1.02, 1.16      | 1.02                     | 0.96, 1.09      |
| 65-74                             | 21% (20%, 21%)                | 1.00                  | Reference       | 1.00                     | Reference       |
| 75-84                             | 19% (19%, 20%)                | 0.93                  | 0.87, 0.99      | 0.91                     | 0.86, 0.97      |
| >=85                              | 16% (14%, 17%)                | 0.74                  | 0.66, 0.83      | 0.72                     | 0.64, 0.81      |
| <b>Charlson Comorbidity Index</b> |                               |                       |                 |                          |                 |
| Comorbidity 0                     | 21% (21%, 22%)                | 1.00                  | Reference       | 1.00                     | Reference       |
| Comorbidity 1-2                   | 20% (20%, 21%)                | 0.95                  | 0.90, 1.00      | 1.05                     | 1.00, 1.11      |
| Comorbidity >3                    | 19% (18%, 21%)                | 0.90                  | 0.82, 0.98      | 1.06                     | 0.97, 1.16      |
| <b>Region of residence</b>        |                               |                       |                 |                          |                 |
| Capital Region of Denmark         | 22% (21%, 23%)                | 1.00                  | Reference       | 1.00                     | Reference       |
| Region of Northern Denmark        | 18% (17%, 19%)                | 0.81                  | 0.74, 0.89      | 0.82                     | 0.75, 0.89      |
| Central Denmark Region            | 21% (20%, 22%)                | 0.98                  | 0.91, 1.04      | 1.06                     | 0.99, 1.13      |
| Region of Southern Denmark        | 20% (19%, 21%)                | 0.92                  | 0.86, 0.98      | 0.93                     | 0.87, 1.00      |
| Region Zealand                    | 22% (21%, 23%)                | 1.00                  | 0.93, 1.07      | 1.00                     | 0.93, 1.07      |
| <b>Surgical priority</b>          |                               |                       |                 |                          |                 |
| Elective                          | 20% (20%, 21%)                | 1.00                  | Reference       | 1.00                     | Reference       |
| Emergency                         | 33% (31%, 35%)                | 1.83                  | 1.69, 1.98      | 1.69                     | 1.55, 1.83      |

CIF: Cumulative incidence function of CRC recurrence treating death and second primary cancer as competing events. CIF considering each variable individually.

<sup>†</sup> sHR = Subdistribution hazard ratio by Fine-Gray regression, CI = Confidence Interval

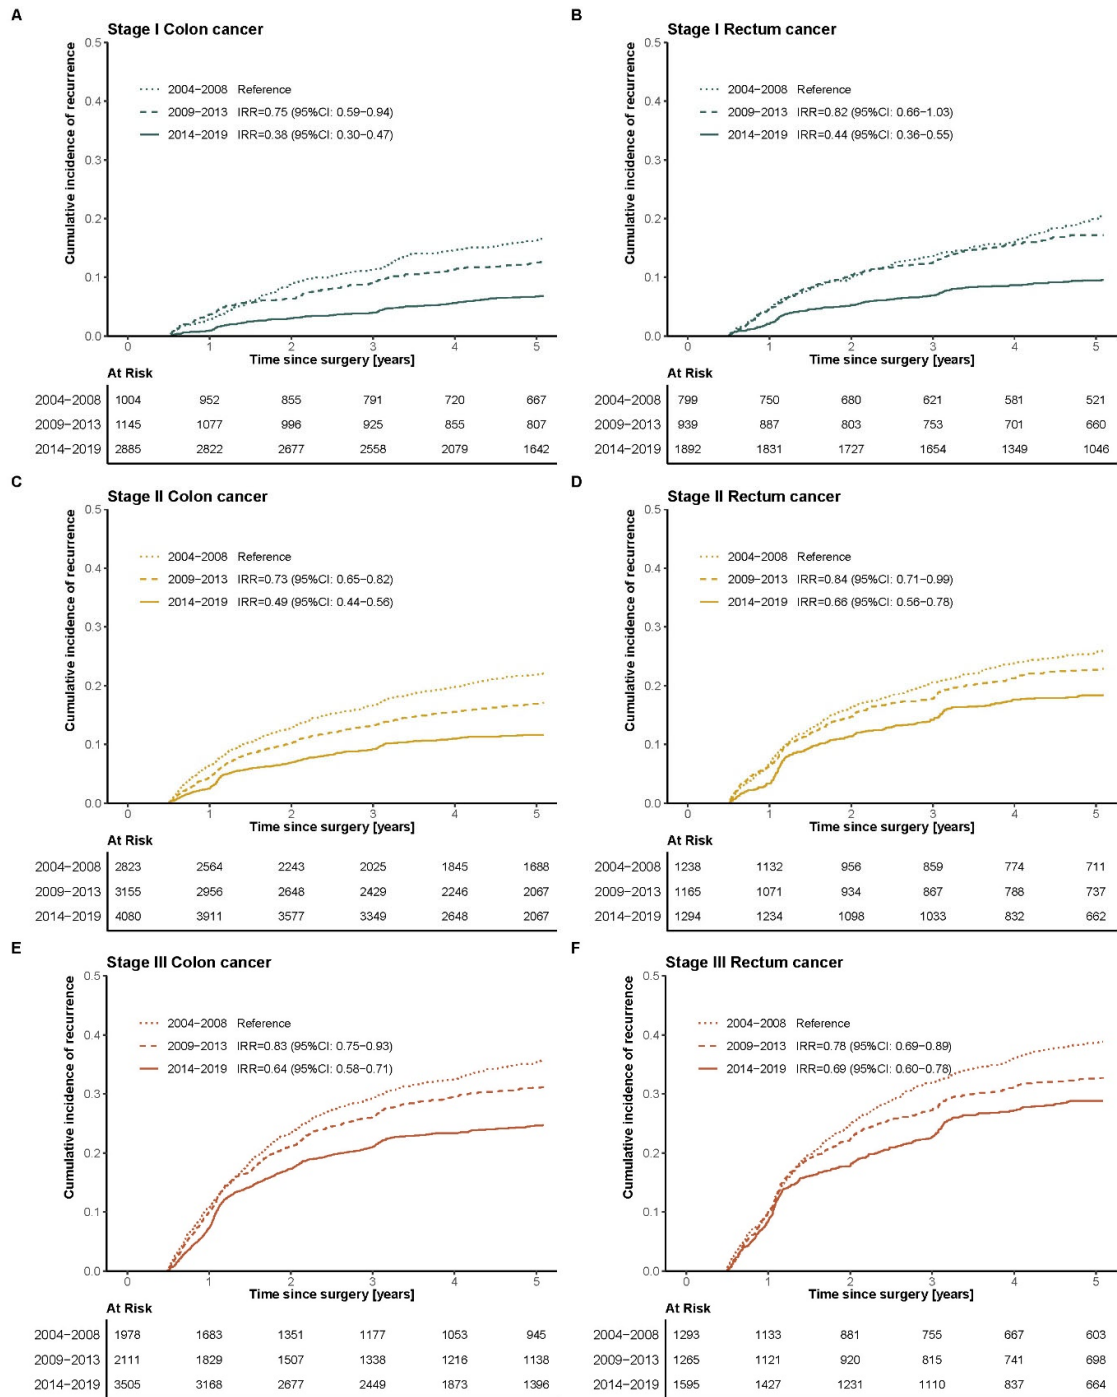

**eFigure 5.** Cumulative Incidence Curves for CRC Recurrence by Calendar Period of Primary Surgery and Stratified by Tumor Site and UICC Stage  
 Constructed using the Aalen-Johansen estimator. Patients were right-censored at emigration, five years of follow-up or on January 1<sup>st</sup> 2023.

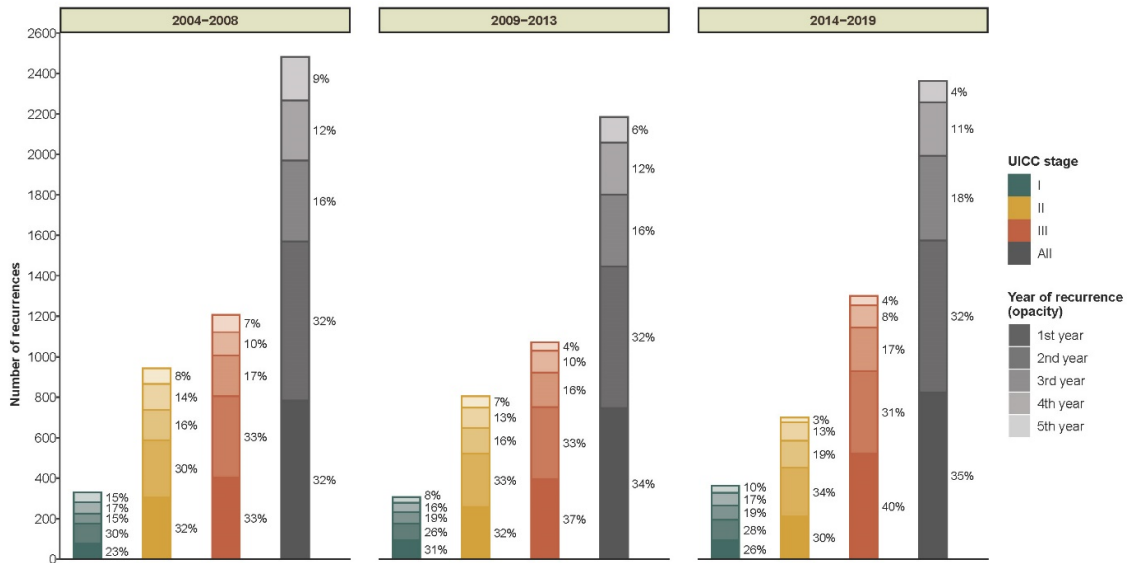

**eFigure 6.** CRC Recurrences by Postoperative Year Stratified by Calendar Period of Primary Surgery

Colored by UICC stage and opacity is determined by the time of recurrence. For each UICC stage we calculated the proportions by determining the number of recurrences diagnosed in each postoperative year and dividing it by the total number of recurrences within the calendar period.

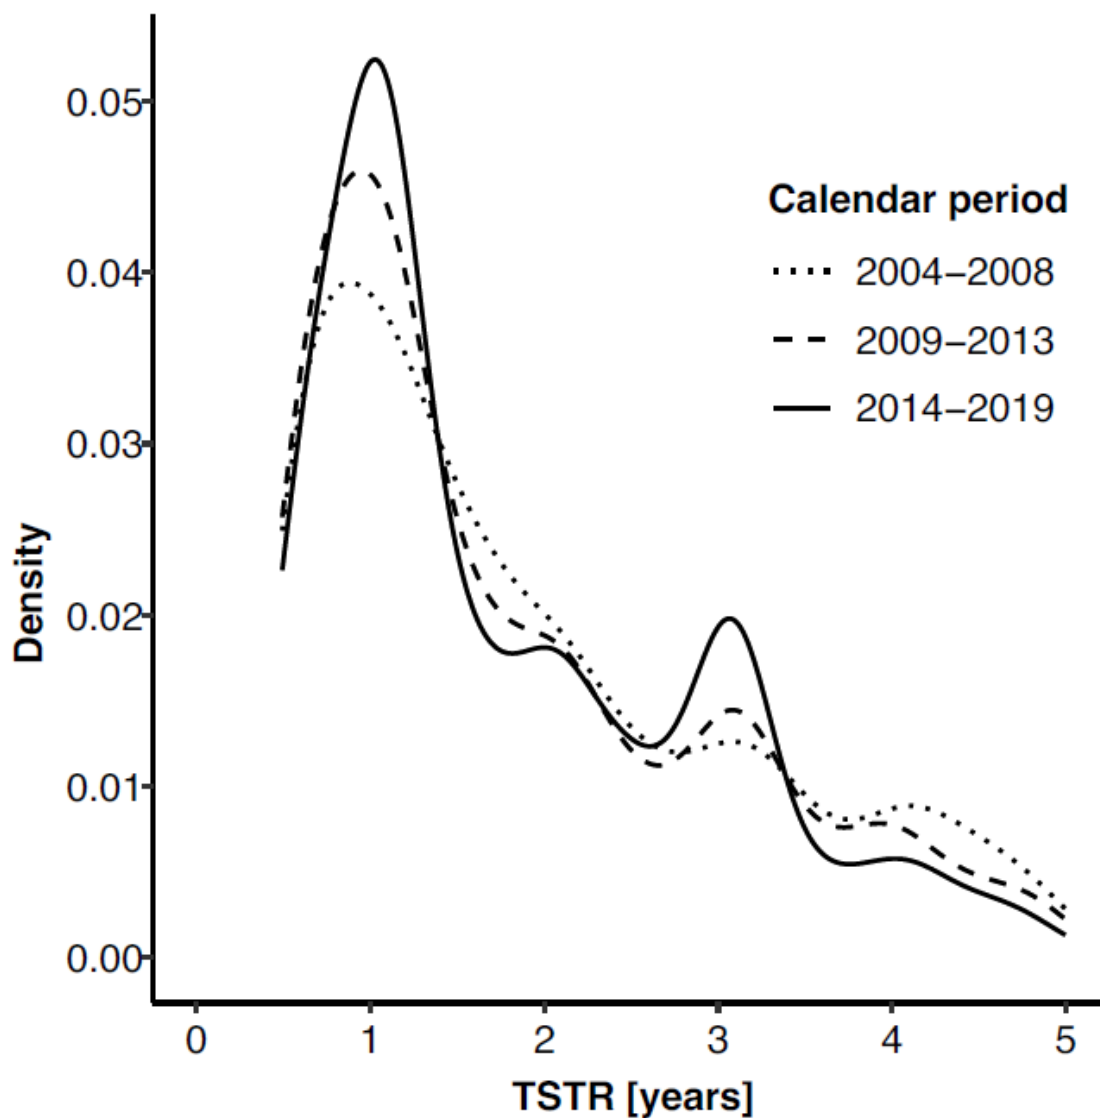

**eFigure 7.** Density Plot of Time From Surgery to Recurrence in Patients with CRC

Recurrence by Calendar Period

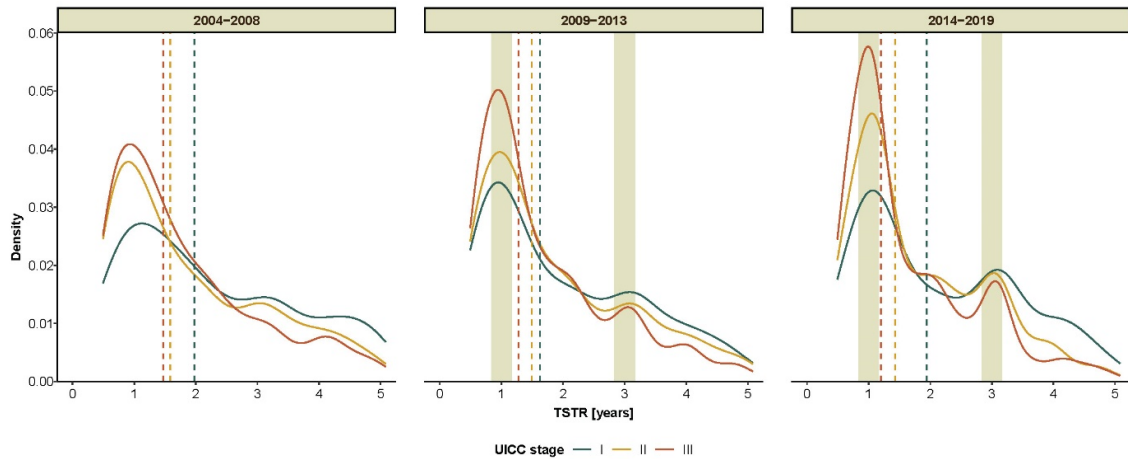

**eFigure 8.** Time From Surgery to Recurrence (Among Patients With Recurrence Within 5 Years After Primary Surgery) by UICC TNM Stage in Patients with UICC Stage I to III CRC Treated in 2004-2008, 2009-2013, and 2014-2019.

TSTR: Time from surgery to recurrence. Vertical lines represent median TSTR. Colored areas represent time points of surveillance imaging at 12 and 36 months ( $\pm 2$  months) postoperative as per guidelines from 2009 and onwards.

Difference in TSTR between pUICC stages was estimated as time ratio (95% CI) using an accelerated failure time (AFT) model including tumor site, age, sex and Charlson Comorbidity Index score and right-censoring patients at second primary cancer (competing event), death (competing event), emigration, five years postoperative or January 1<sup>st</sup> 2023.

**2004-2008** Time ratio<sub>stage II vs. I</sub> = 0.70 (95%CI: 0.62 – 0.78)

Time ratio<sub>stage III vs. I</sub> = 0.40 (95%CI: 0.35 – 0.45)

**2009-2013** Time ratio<sub>stage II vs. I</sub> = 0.71 (95%CI: 0.62 – 0.81)

Time ratio<sub>stage III vs. I</sub> = 0.36 (95%CI: 0.32 – 0.41)

**2014-2019** Time ratio<sub>stage II vs. I</sub> = 0.53 (95%CI: 0.47 – 0.59)

Time ratio<sub>stage III vs. I</sub> = 0.23 (95%CI: 0.20 – 0.26)

**eTable 4.** Patient Demographics and Treatment Characteristics of the 2014-2019 Study Population by Screening Status

| Variable                                       | Overall, N = 15,251 <sup>1</sup> | Screening status |                  |
|------------------------------------------------|----------------------------------|------------------|------------------|
|                                                |                                  | NSD<br>N=10,919  | SD<br>N=4,332    |
| <b>Sex, n (%)</b>                              |                                  |                  |                  |
| Female                                         | 6,821 (45%)                      | 5,061 (46%)      | 1,760 (41%)      |
| Male                                           | 8,430 (55%)                      | 5,858 (54%)      | 2,572 (59%)      |
| <b>Age, median (IQR)</b>                       | 70 (63-76)                       | 71 (63-79)       | 67 (62-72)       |
| <b>Body mass index, median (IQR)</b>           | 25.8 (23.2-29.1)                 | 25.5 (22.9-28.7) | 26.6 (24.0-29.9) |
| <b>Charlson Comorbidity Index score, n (%)</b> |                                  |                  |                  |
| Comorbidity 0                                  | 8,505 (56%)                      | 5,977 (55%)      | 2,528 (58%)      |
| Comorbidity 1-2                                | 5,216 (34%)                      | 3,744 (34%)      | 1,472 (34%)      |
| Comorbidity >3                                 | 1,530 (10%)                      | 1,198 (11%)      | 332 (7.7%)       |
| <b>Place of residence, n (%)</b>               |                                  |                  |                  |
| Region of Northern Denmark                     | 1,721 (11%)                      | 1,221 (11%)      | 500 (12%)        |
| Central Denmark Region                         | 3,433 (23%)                      | 2,479 (23%)      | 954 (22%)        |
| Region of Southern Denmark                     | 3,502 (23%)                      | 2,481 (23%)      | 1,021 (24%)      |
| Region Zealand                                 | 2,461 (16%)                      | 1,692 (15%)      | 769 (18%)        |
| Capital Region of Denmark                      | 4,134 (27%)                      | 3,046 (28%)      | 1,088 (25%)      |
| <b>Tumor site, n (%)</b>                       |                                  |                  |                  |
| Colon                                          | 10,470 (69%)                     | 7,407 (68%)      | 3,063 (71%)      |
| Rectum                                         | 4,781 (31%)                      | 3,512 (32%)      | 1,269 (29%)      |
| <b>UICC stage, n (%)</b>                       |                                  |                  |                  |
| I                                              | 4,777 (31%)                      | 2,694 (25%)      | 2,083 (48%)      |
| II                                             | 5,374 (35%)                      | 4,272 (39%)      | 1,102 (25%)      |
| III                                            | 5,100 (33%)                      | 3,953 (36%)      | 1,147 (26%)      |
| <b>T-category*, n (%)</b>                      |                                  |                  |                  |
| T1                                             | 2,513 (18%)                      | 1,170 (12%)      | 1,343 (32%)      |
| T2                                             | 2,642 (19%)                      | 1,682 (17%)      | 960 (23%)        |
| T3                                             | 6,800 (49%)                      | 5,219 (53%)      | 1,581 (38%)      |
| T4                                             | 1,673 (12%)                      | 1,481 (15%)      | 192 (4.6%)       |
| Tx                                             | 383 (2.7%)                       | 284 (2.9%)       | 99 (2.4%)        |
| <b>N-category*, n (%)</b>                      |                                  |                  |                  |
| N0                                             | 8,728 (62%)                      | 5,898 (60%)      | 2,830 (68%)      |
| N1                                             | 2,969 (21%)                      | 2,214 (23%)      | 755 (18%)        |
| N2                                             | 1,488 (11%)                      | 1,193 (12%)      | 295 (7.1%)       |
| Nx                                             | 822 (5.9%)                       | 529 (5.4%)       | 293 (7.0%)       |
| <b>Adjuvant chemotherapy, n (%)</b>            | 4,203 (28%)                      | 3,061 (28%)      | 1,142 (26%)      |
| <b>Neoadjuvant treatment, n (%)</b>            | 1,240 (8.1%)                     | 1,083 (9.9%)     | 157 (3.6%)       |

\*Not reported for patients treated with neoadjuvant oncological therapy

NSD: non-screening detected, SD: screening detected

<sup>1</sup> n (%); Median (25%-75%)



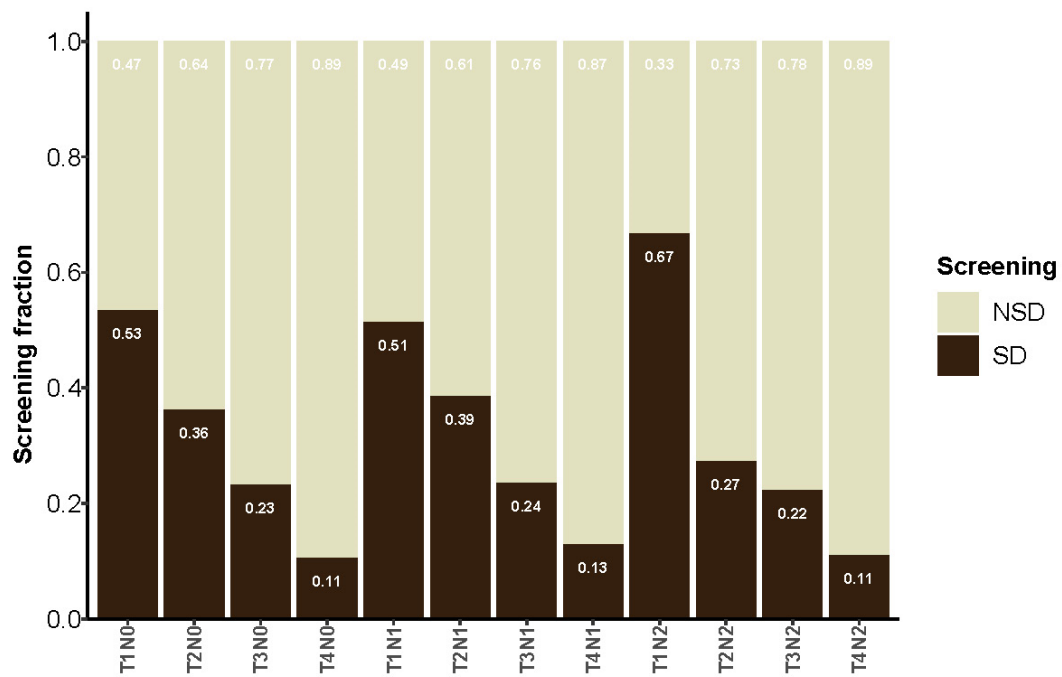

**eFigure 9.** Association Between TN Category and Screening Status in Patients with UICC Stage I to III CRC

NSD: non-screening detected. SD: screening detected.

**eTable 5.** Rates and Hazards of Recurrence in Screening- vs. Nonscreening-Detected UICC Stage I to III CRC, 2014 to 2019

| Characteristic        | Cumulative incidence function |                             |                             | Fine-Gray regression |                 |
|-----------------------|-------------------------------|-----------------------------|-----------------------------|----------------------|-----------------|
|                       | 1-year CIF                    | 3-year CIF                  | 5-year CIF                  | sHR <sup>1</sup>     | CI <sup>1</sup> |
| <b>Colon cancer</b>   |                               |                             |                             |                      |                 |
| <b>UICC stage I</b>   |                               |                             |                             |                      |                 |
| NSD                   | 1.9% (95% CI: 1.3%-2.7%)      | 5.3% (95% CI: 4.2%-6.5%)    | 8.1% (95% CI: 6.8%-9.7%)    | 1.00                 | Reference       |
| SD                    | 1.0% (95% CI: 0.6%-1.6%)      | 3.4% (95% CI: 2.6%-4.5%)    | 5.3% (95% CI: 4.2%-6.6%)    | 0.65                 | 0.47, 0.89      |
| <b>UICC stage II</b>  |                               |                             |                             |                      |                 |
| NSD                   | 3.9% (95% CI: 3.2%-4.6%)      | 10.5% (95% CI: 9.5%-11.6%)  | 12.3% (95% CI: 11.2%-13.5%) | 1.00                 | Reference       |
| SD                    | 2.4% (95% CI: 1.6%-3.6%)      | 6.7% (95% CI: 5.2%-8.5%)    | 8.9% (95% CI: 7.1%-10.9%)   | 0.64                 | 0.49, 0.82      |
| <b>UICC stage III</b> |                               |                             |                             |                      |                 |
| NSD                   | 10.7% (95% CI: 9.6%-11.9%)    | 23.1% (95% CI: 21.5%-24.7%) | 25.9% (95% CI: 24.2%-27.5%) | 1.00                 | Reference       |
| SD                    | 6.8% (95% CI: 5.2%-8.7%)      | 17.3% (95% CI: 14.8%-20.0%) | 20.3% (95% CI: 17.5%-23.2%) | 0.71                 | 0.59, 0.85      |
| <b>Rectum cancer</b>  |                               |                             |                             |                      |                 |
| <b>UICC stage I</b>   |                               |                             |                             |                      |                 |
| NSD                   | 2.7% (95% CI: 1.9%-3.8%)      | 7.6% (95% CI: 6.2%-9.1%)    | 9.8% (95% CI: 8.2%-11.6%)   | 1.00                 | Reference       |
| SD                    | 2.6% (95% CI: 1.6%-4.0%)      | 6.9% (95% CI: 5.1%-8.9%)    | 9.0% (95% CI: 7.0%-11.3%)   | 0.90                 | 0.65, 1.24      |
| <b>UICC stage II</b>  |                               |                             |                             |                      |                 |
| NSD                   | 5.4% (95% CI: 4.1%-6.9%)      | 15.7% (95% CI: 13.5%-17.9%) | 19.2% (95% CI: 16.9%-21.7%) | 1.00                 | Reference       |
| SD                    | 3.9% (95% CI: 1.9%-6.9%)      | 11.1% (95% CI: 7.5%-15.5%)  | 14.5% (95% CI: 10.3%-19.5%) | 0.68                 | 0.47, 0.99      |
| <b>UICC stage III</b> |                               |                             |                             |                      |                 |
| NSD                   | 11.2% (95% CI: 9.6%-13.1%)    | 24.8% (95% CI: 22.5%-27.2%) | 29.8% (95% CI: 27.3%-32.4%) | 1.00                 | Reference       |
| SD                    | 10.6% (95% CI: 7.7%-14.1%)    | 20.9% (95% CI: 16.8%-25.4%) | 25.0% (95% CI: 20.5%-29.7%) | 0.82                 | 0.64, 1.04      |

CIF: Cumulative incidence function of CRC recurrence treating death and second primary cancer (other than colorectal cancer or non-melanoma skin cancer) as competing event.  
 NDS: non-screening detected, SD: screening detected.

<sup>1</sup> sHR = Subdistribution hazard ratio by Fine-Gray regression adjusted for age, sex and Charlson Comorbidity Index score, CI = Confidence Interval

**eTable 6.** Decrease in Risk of Recurrence by Screening and Improved Treatment from 2009-2013 and 2014-2019 in UICC Stage I to III CRC

| Characteristic        | 2014-2019<br>Non-screening-detected CRC |                    | 2014-2019<br>Screening-detected CRC |                    | Additional reduction<br>for screening-<br>detected patients<br>(SD-NSD) |                                    |
|-----------------------|-----------------------------------------|--------------------|-------------------------------------|--------------------|-------------------------------------------------------------------------|------------------------------------|
|                       | 2009-2013<br>5-year CIF (95%CI)         | 5-year CIF (95%CI) | Percentage point<br>reduction (NSD) | 5-year CIF (95%CI) |                                                                         | Percentage point<br>reduction (SD) |
| <b>Colon cancer</b>   |                                         |                    |                                     |                    |                                                                         |                                    |
| <b>UICC stage I</b>   | 12.5% (10.7-14.5)                       | 8.1% (6.8-9.7)     | 4.5%                                | 5.3% (4.2-6.6)     | 7.2%                                                                    | 2.7%                               |
| <b>UICC stage II</b>  | 17.0% (15.7-18.3)                       | 12.3% (11.2-13.5)  | 4.7%                                | 8.9% (7.1-10.9)    | 8.1%                                                                    | 3.4%                               |
| <b>UICC stage III</b> | 31.1% (29.1-33.1)                       | 25.9 (24.2-27.5)   | 5.2%                                | 20.3% (17.5-23.2)  | 10.8%                                                                   | 5.6%                               |
| <b>Rectum cancer</b>  |                                         |                    |                                     |                    |                                                                         |                                    |
| <b>UICC stage I</b>   | 17.1% (14.8-19.6)                       | 9.8% (8.2-11.6)    | 7.3%                                | 9.0% (7.0-11.3)    | 8.1%                                                                    | 0.8%                               |
| <b>UICC stage II</b>  | 22.7% (20.4-25.2)                       | 19.2% (16.9-21.7)  | 3.5%                                | 14.5% (10.3-19.5)  | 8.2%                                                                    | 4.7%                               |
| <b>UICC stage III</b> | 32.6% (30.0-35.1)                       | 29.8% (27.3-32.4)  | 2.8%                                | 25.0% (20.5-29.7)  | 7.6%                                                                    | 4.8%                               |

CIF: Cumulative incidence function of CRC recurrence treating death and second primary cancer (other than colorectal cancer or non-melanoma skin cancer) as competing event.

95%CI: Confidence interval

CRC: Colorectal cancer, NSD: Non-screening detected, SD: Screening-detected.
